# Supplementary material
Source: ML conference proceedings conference paper supplement (https://proceedings.neurips.cc/paper_files/paper/2015/hash/d1fe173d08e959397adf34b1d77e88d7-Abstract.html)
Supplement: Supplementary file [file d1fe173d08e959397adf34b1d77e88d7-Supplemental.zip]

# LL-LVM supplementary material

**Notation** The vectorized version of a matrix is  $\text{vec}(\mathbf{M})$ . We denote an identity matrix of size  $m$  with  $\mathbf{I}_m$ . Other notations are the same as used in the main text.

## A Matrix normal distribution

The matrix normal distribution generalises the standard multivariate normal distribution to matrix-valued variables. A matrix  $\mathbf{A} \in \mathbb{R}^{n \times p}$  is said to follow a matrix normal distribution  $\mathcal{MN}_{n,p}(\mathbf{M}, \mathbf{U}, \mathbf{V})$  with parameters  $\mathbf{U}$  and  $\mathbf{V}$  if its density is given by

$$p(\mathbf{A} \mid \mathbf{M}, \mathbf{U}, \mathbf{V}) = \frac{\exp\left(-\frac{1}{2} \text{Tr}[\mathbf{V}^{-1}(\mathbf{A} - \mathbf{M})^T \mathbf{U}^{-1}(\mathbf{A} - \mathbf{M})]\right)}{(2\pi)^{np/2} |\mathbf{V}|^{n/2} |\mathbf{U}|^{p/2}}. \quad (1)$$

If  $\mathbf{A} \sim \mathcal{MN}(\mathbf{M}, \mathbf{U}, \mathbf{V})$ , then  $\text{vec}(\mathbf{A}) \sim \mathcal{N}(\text{vec}(\mathbf{M}), \mathbf{V} \otimes \mathbf{U})$ , a relationship we will use to simplify many expressions.

## B Matrix normal expressions of priors and likelihood

Recall that  $\mathbf{G}_{ij} = \eta_{ij}$ .

**Prior on low dimensional latent variables**

$$\log p(\mathbf{x} \mid \mathbf{G}, \alpha) = -\frac{\alpha}{2} \sum_{i=1}^n \|\mathbf{x}_i\|^2 - \frac{1}{2} \sum_{i=1}^n \sum_{j=1}^n \eta_{ij} \|\mathbf{x}_i - \mathbf{x}_j\|^2 - \log Z_{\mathbf{x}} \quad (2)$$

$$= -\frac{1}{2} \log |2\pi \mathbf{\Pi}| - \frac{1}{2} \mathbf{x}^\top \mathbf{\Pi}^{-1} \mathbf{x}, \quad (3)$$

where

$$\begin{aligned} \mathbf{\Pi}^{-1} &:= \alpha \mathbf{I}_{nd_x} + \mathbf{\Omega}^{-1}, \\ \mathbf{\Omega}^{-1} &:= 2\mathbf{L} \otimes \mathbf{I}_{d_x}, \\ \mathbf{L} &:= \text{diag}(\mathbf{G}\mathbf{1}) - \mathbf{G}. \end{aligned}$$

$\mathbf{L}$  is known as a graph Laplacian. It follows that  $p(\mathbf{x} \mid \mathbf{G}, \alpha) = \mathcal{N}(\mathbf{0}, \mathbf{\Pi})$ . The prior covariance  $\mathbf{\Pi}$  can be rewritten as

$$\mathbf{\Pi}^{-1} = \alpha \mathbf{I}_n \otimes \mathbf{I}_{d_x} + 2\mathbf{L} \otimes \mathbf{I}_{d_x} \quad (4)$$

$$= (\alpha \mathbf{I}_n + 2\mathbf{L}) \otimes \mathbf{I}_{d_x}, \quad (5)$$

$$\mathbf{\Pi} = (\alpha \mathbf{I}_n + 2\mathbf{L})^{-1} \otimes \mathbf{I}_{d_x}. \quad (6)$$

By the relationship of a matrix normal and multivariate normal distributions described in section A, the equivalent prior for the matrix  $\mathbf{X} = [\mathbf{x}_1 \mathbf{x}_2 \cdots \mathbf{x}_n] \in \mathbb{R}^{d_x \times n}$ , constructed by reshaping  $\mathbf{x}$ , is given by

$$p(\mathbf{X} \mid \mathbf{G}, \alpha) = \mathcal{MN}(\mathbf{X} \mid \mathbf{0}, \mathbf{I}_{d_x}, (\alpha \mathbf{I}_n + 2\mathbf{L})^{-1}). \quad (7)$$

**Prior on locally linear maps**

Recall that  $\mathbf{C} = [\mathbf{C}_1, \dots, \mathbf{C}_n] \in \mathbb{R}^{d_y \times nd_x}$  where each  $\mathbf{C}_i \in \mathbb{R}^{d_y \times d_x}$ . We formulate the log prior on  $\mathbf{C}$  as

$$\begin{aligned} \log p(\mathbf{C} \mid \mathbf{G}) &= -\frac{\epsilon}{2} \left\| \sum_{i=1}^n \mathbf{C}_i \right\|_F^2 - \frac{1}{2} \sum_{i=1}^n \sum_{j=1}^n \eta_{ij} \|\mathbf{C}_i - \mathbf{C}_j\|_F^2 - \log Z_{\mathbf{C}}, \\ &= -\frac{\epsilon}{2} \text{Tr}(\mathbf{C} \mathbf{J} \mathbf{J}^\top \mathbf{C}^\top) - \frac{1}{2} \text{Tr}(\mathbf{\Omega}^{-1} \mathbf{C}^\top \mathbf{C}) - \log Z_{\mathbf{C}}, \text{ where } \mathbf{J} := \mathbf{1}_n \otimes \mathbf{I}_{d_x}, \\ &= -\frac{1}{2} \text{Tr}[(\epsilon \mathbf{J} \mathbf{J}^\top + \mathbf{\Omega}^{-1}) \mathbf{C}^\top \mathbf{C}] - \log Z_{\mathbf{C}}. \end{aligned} \quad (8)$$

In the first line, the first term imposes a constraint that the mean of  $\mathbf{C}_i$  should not be too large. The second term encourages the the locally linear maps of neighbouring points  $i$  and  $j$  to be similar in the sense of the Frobenius norm. Notice that the last line is in the form of a the log of a matrix normal density with mean 0 where  $Z_c$  is given by

$$\log Z_c = \frac{nd_x d_y}{2} \log |2\pi| - \frac{d_y}{2} \log |\epsilon \mathbf{J} \mathbf{J}^\top + \boldsymbol{\Omega}^{-1}| \quad (9)$$

The expression is equivalent to

$$p(\mathbf{C}|\mathbf{G}) = \mathcal{MN}(\mathbf{C}|\mathbf{0}, \mathbf{I}_{d_y}, (\epsilon \mathbf{J} \mathbf{J}^\top + \boldsymbol{\Omega}^{-1})^{-1}). \quad (10)$$

In our implementation, we fix  $\epsilon$  to a small value, since the magnitude of  $\mathbf{C}_i$  and  $\mathbf{x}_i$  can be controlled by the hyper-parameter  $\alpha$ , which is optimized in the M-step.

## Likelihood

We penalise linear approximation error of the tangent spaces. Assume that the noise precision matrix is a scaled identity matrix ei.g.,  $\mathbf{V}^{-1} = \gamma \mathbf{I}_{d_y}$ .

$$\log p(\mathbf{y}|\mathbf{x}, \mathbf{C}, \mathbf{V}, \mathbf{G}) = -\frac{\epsilon}{2} \left\| \sum_{i=1}^n \mathbf{y}_i \right\|^2 - \log Z_y \quad (11)$$

$$\begin{aligned} & -\frac{1}{2} \sum_{i=1}^n \sum_{j=1}^n \eta_{ij} ((\mathbf{y}_j - \mathbf{y}_i) - \mathbf{C}_i(\mathbf{x}_j - \mathbf{x}_i))^\top \mathbf{V}^{-1} ((\mathbf{y}_j - \mathbf{y}_i) - \mathbf{C}_i(\mathbf{x}_j - \mathbf{x}_i)), \\ & = -\frac{1}{2} (\mathbf{y}^\top \Sigma_y^{-1} \mathbf{y} - 2\mathbf{y}^\top \mathbf{e} + f) - \log Z_y, \end{aligned} \quad (12)$$

where

$$\mathbf{y} = [\mathbf{y}_1^\top, \dots, \mathbf{y}_n^\top]^\top \in \mathbb{R}^{nd_y} \quad (13)$$

$$\Sigma_y^{-1} = (\epsilon \mathbf{1}_n \mathbf{1}_n^\top) \otimes \mathbf{I}_{d_y} + 2\mathbf{L} \otimes \mathbf{V}^{-1}, \quad (14)$$

$$\mathbf{e} = [\mathbf{e}_1^\top, \dots, \mathbf{e}_n^\top]^\top \in \mathbb{R}^{nd_y}, \quad (15)$$

$$\mathbf{e}_i = -\sum_{j=1}^n \eta_{ji} \mathbf{V}^{-1} (\mathbf{C}_j + \mathbf{C}_i) (\mathbf{x}_j - \mathbf{x}_i), \quad (16)$$

$$f = \sum_{i=1}^n \sum_{j=1}^n \eta_{ij} (\mathbf{x}_j - \mathbf{x}_i)^\top \mathbf{C}_i^\top \mathbf{V}^{-1} \mathbf{C}_i (\mathbf{x}_j - \mathbf{x}_i). \quad (17)$$

By completing the quadratic form in  $\mathbf{y}$ , we want to write down the likelihood as a multivariate Gaussian<sup>1</sup> :

$$p(\mathbf{y}|\mathbf{x}, \mathbf{C}, \mathbf{V}, \mathbf{G}) = \mathcal{N}(\boldsymbol{\mu}_y, \Sigma_y), \quad (18)$$

$$\boldsymbol{\mu}_y = \Sigma_y \mathbf{e}. \quad (19)$$

---

<sup>1</sup>The equivalent expression in term of matrix normal distribution for  $\mathbf{Y} = [\mathbf{y}_1, \mathbf{y}_2, \dots, \mathbf{y}_n] \in \mathbb{R}^{d_y \times n}$

$$p(\mathbf{Y}|\mathbf{x}, \mathbf{C}, \gamma, \mathbf{G}) = \mathcal{MN}(\mathbf{Y}|\mathbf{M}_y, \mathbf{I}_{d_y}, (\epsilon \mathbf{1}_n \mathbf{1}_n^\top + 2\gamma \mathbf{L})^{-1}),$$

$$\mathbf{M}_y = \mathbf{E}(\epsilon \mathbf{1}_n \mathbf{1}_n^\top + 2\gamma \mathbf{L})^{-1},$$

where  $\mathbf{E} = [\mathbf{e}_1, \dots, \mathbf{e}_n] \in \mathbb{R}^{d_y \times n}$ . The covariance in Eq. (13) decomposes

$$\Sigma_y^{-1} = (\epsilon \mathbf{1}_n \mathbf{1}_n^\top) \otimes \mathbf{I}_{d_y} + 2\mathbf{L} \otimes \mathbf{V}^{-1},$$

$$= (\epsilon \mathbf{1}_n \mathbf{1}_n^\top + 2\gamma \mathbf{L}) \otimes \mathbf{I}_{d_y},$$

$$\Sigma_y = (\epsilon \mathbf{1}_n \mathbf{1}_n^\top + 2\gamma \mathbf{L})^{-1} \otimes \mathbf{I}_{d_y}.$$

By equating Eq. (11) with Eq. (18), we get the normalisation term  $Z_{\mathbf{y}}$

$$-\frac{1}{2}(\mathbf{y}^\top \Sigma_{\mathbf{y}}^{-1} \mathbf{y} - 2\mathbf{y}^\top \mathbf{e} + f) - \log Z_{\mathbf{y}} = -\frac{1}{2}(\mathbf{y} - \boldsymbol{\mu}_{\mathbf{y}})^\top \Sigma_{\mathbf{y}}^{-1} (\mathbf{y} - \boldsymbol{\mu}_{\mathbf{y}}) - \frac{1}{2} \log |2\pi \Sigma_{\mathbf{y}}|, \quad (20)$$

$$\log Z_{\mathbf{y}} = \frac{1}{2}(\boldsymbol{\mu}_{\mathbf{y}}^\top \Sigma_{\mathbf{y}}^{-1} \boldsymbol{\mu}_{\mathbf{y}} - f) + \frac{1}{2} \log |2\pi \Sigma_{\mathbf{y}}|, \quad (21)$$

$$Z_{\mathbf{y}} = \exp(\frac{1}{2}(\boldsymbol{\mu}_{\mathbf{y}}^\top \Sigma_{\mathbf{y}}^{-1} \boldsymbol{\mu}_{\mathbf{y}} - f)) |2\pi \Sigma_{\mathbf{y}}|^{\frac{1}{2}}, \quad (22)$$

$$= \exp(\frac{1}{2}(\mathbf{e}^\top \Sigma_{\mathbf{y}} \mathbf{e} - f)) |2\pi \Sigma_{\mathbf{y}}|^{\frac{1}{2}}. \quad (23)$$

Therefore, the normalised log-likelihood can be written as

$$\log p(\mathbf{y}|\mathbf{x}, \mathbf{C}, \mathbf{V}, \mathbf{G}) = -\frac{1}{2}(\mathbf{y}^\top \Sigma_{\mathbf{y}}^{-1} \mathbf{y} - 2\mathbf{y}^\top \mathbf{e} + \mathbf{e}^\top \Sigma_{\mathbf{y}} \mathbf{e}) - \frac{1}{2} \log |2\pi \Sigma_{\mathbf{y}}|. \quad (24)$$

### Convenient form for EM

For the EM derivation in the next section, it is convenient to write the exponent term in terms of linear and quadratic functions in  $\mathbf{x}$  and  $\mathbf{C}$ , respectively. The linear terms appear in  $\mathbf{y}^\top \mathbf{e}$ , which we write as a linear function in  $\mathbf{x}$  or  $\mathbf{C}$

$$\mathbf{y}^\top \mathbf{e} = \mathbf{x}^\top \mathbf{b}, \quad (25)$$

$$= \text{Tr}(\mathbf{C}^\top \mathbf{V}^{-1} \mathbf{H}), \quad (26)$$

where

$$\mathbf{H} = [\mathbf{H}_1, \dots, \mathbf{H}_n] \in R^{d_y \times nd_x}, \quad \text{where } \mathbf{H}_i = \sum_{j=1}^n \eta_{ij} (\mathbf{y}_j - \mathbf{y}_i) (\mathbf{x}_j - \mathbf{x}_i)^\top, \quad (27)$$

$$\mathbf{b} = [\mathbf{b}_1^\top, \dots, \mathbf{b}_n^\top]^\top \in R^{nd_x}, \quad \text{where } \mathbf{b}_i = \sum_{j=1}^n \eta_{ij} (\mathbf{C}_j^\top \mathbf{V}^{-1} (\mathbf{y}_i - \mathbf{y}_j) - \mathbf{C}_i^\top \mathbf{V}^{-1} (\mathbf{y}_j - \mathbf{y}_i)). \quad (28)$$

The quadratic terms appear in  $\mathbf{e}^\top \Sigma_{\mathbf{y}} \mathbf{e}$ , which we write as a quadratic function of  $\mathbf{x}$  or a quadratic function of  $\mathbf{C}$

$$\mathbf{e}^\top \Sigma_{\mathbf{y}} \mathbf{e} = \mathbf{x}^\top \mathbf{A}_E^\top \Sigma_{\mathbf{y}} \mathbf{A}_E \mathbf{x}, \quad (29)$$

$$= \text{Tr}[\mathbf{Q} \tilde{\mathbf{L}} \mathbf{Q}^\top \mathbf{C}^\top \mathbf{C}], \quad (30)$$

where the  $i, j$ th ( $d_y \times d_x$ ) chunk of  $\mathbf{A}_E \in \mathbb{R}^{nd_y \times nd_x}$  is given by

$$\mathbf{A}_E(i, j) = -\eta_{ij} \mathbf{V}^{-1} (\mathbf{C}_j + \mathbf{C}_i) + \delta_{ij} \left[ \sum_k \eta_{ik} \mathbf{V}^{-1} (\mathbf{C}_k + \mathbf{C}_i) \right]. \quad (31)$$

The matrix  $\tilde{\mathbf{L}} = (\epsilon \mathbf{1}_n \mathbf{1}_n^\top + 2\gamma \mathbf{L})^{-1}$  and  $\mathbf{Q} = [\mathbf{q}_1 \mathbf{q}_2 \dots \mathbf{q}_n] \in \mathbb{R}^{nd_x \times n}$  and the  $i$ th column of this matrix is denoted by  $\mathbf{q}_i \in \mathbb{R}^{nd_x}$ . The  $j$ th chunk (of length  $d_x$ ) of the  $i$ th column is given by

$$\mathbf{q}_i(j) = \eta_{ij} \mathbf{V}^{-1} (\mathbf{x}_i - \mathbf{x}_j) + \delta_{ij} \left[ \sum_k \eta_{ik} \mathbf{V}^{-1} (\mathbf{x}_i - \mathbf{x}_k) \right]. \quad (32)$$

## C Variational inference

In LL-LVM, the goal is to infer the latent variables  $(\mathbf{x}, \mathbf{C})$  as well as to learn the hyper-parameters  $\boldsymbol{\theta} = \{\alpha, \gamma\}$ . We infer them by maximising the lower bound of the marginal likelihood of the observations  $\mathbf{y}$ .

$$\begin{aligned} \log p(\mathbf{y}|\boldsymbol{\theta}, \mathbf{G}) &= \log \int \int p(\mathbf{y}, \mathbf{C}, \mathbf{x}|\mathbf{G}, \boldsymbol{\theta}) d\mathbf{x} d\mathbf{C}, \\ &\geq \int \int \int q(\mathbf{C}, \mathbf{x}) \log \frac{p(\mathbf{y}, \mathbf{C}, \mathbf{x}|\mathbf{G}, \boldsymbol{\theta})}{q(\mathbf{C}, \mathbf{x})} d\mathbf{x} d\mathbf{C}, \\ &= \mathcal{F}(q(\mathbf{C}, \mathbf{x}), \boldsymbol{\theta}). \end{aligned}$$

For computational tractability, we assume that the posterior over  $(\mathbf{C}, \mathbf{x})$  factorizes as

$$q(\mathbf{C}, \mathbf{x}) = q(\mathbf{x})q(\mathbf{C}). \quad (33)$$

where  $q(\mathbf{x})$  and  $q(\mathbf{C})$  are multivariate normal distributions.

We maximize the lower bound w.r.t.  $q(\mathbf{C}, \mathbf{x})$  and  $\boldsymbol{\theta}$  by the variational expectation maximization algorithm, which consists of (1) the variational expectation step for determining  $q(\mathbf{C}, \mathbf{x})$  by

$$q(\mathbf{x}) \propto \exp \left[ \int q(\mathbf{C}) \log p(\mathbf{y}, \mathbf{C}, \mathbf{x} | \mathbf{G}, \boldsymbol{\theta}) d\mathbf{C} \right], \quad (34)$$

$$q(\mathbf{C}) \propto \exp \left[ \int q(\mathbf{x}) \log p(\mathbf{y}, \mathbf{C}, \mathbf{x} | \mathbf{G}, \boldsymbol{\theta}) d\mathbf{x} \right], \quad (35)$$

followed by (2) the maximization step for estimating  $\boldsymbol{\theta}$ ,  $\hat{\boldsymbol{\theta}} = \arg \max_{\boldsymbol{\theta}} \mathcal{F}(q(\mathbf{C}, \mathbf{x}), \boldsymbol{\theta})$ .

## C.1 VE step

### C.1.1 Computing $q(\mathbf{x})$

In variational E-step, we compute  $q(\mathbf{x})$  by integrating out  $\mathbf{C}$  from the total log joint distribution:

$$\log q(\mathbf{x}) = \mathbb{E}_{q(\mathbf{C})} [\log p(\mathbf{y}, \mathbf{C}, \mathbf{x} | \mathbf{G}, \boldsymbol{\theta})] + \text{const}, \quad (36)$$

$$= \mathbb{E}_{q(\mathbf{C})} [\log p(\mathbf{y} | \mathbf{C}, \mathbf{x}, \mathbf{G}, \boldsymbol{\theta}) + \log p(\mathbf{x} | \mathbf{G}, \boldsymbol{\theta}) + \log p(\mathbf{C} | \mathbf{G}, \boldsymbol{\theta})] + \text{const}. \quad (37)$$

To determine  $q(\mathbf{x})$ , we firstly re-write  $p(\mathbf{y} | \mathbf{C}, \mathbf{x}, \mathbf{G}, \boldsymbol{\theta})$  as a quadratic function in  $\mathbf{x}$ :

$$\log p(\mathbf{y} | \mathbf{C}, \mathbf{x}, \mathbf{G}, \boldsymbol{\theta}) = -\frac{1}{2}(\mathbf{x}^\top \mathbf{A}_E^\top \Sigma_{\mathbf{y}} \mathbf{A}_E \mathbf{x} - 2\mathbf{x}^\top \mathbf{b}) + \text{const}, \quad (38)$$

where

$$\mathbf{A} := \mathbf{A}_E^\top \Sigma_{\mathbf{y}} \mathbf{A}_E, \quad (39)$$

$$\mathbf{A} = \begin{bmatrix} \mathbf{A}_{11} & \mathbf{A}_{12} & \cdots & \mathbf{A}_{1n} \\ \vdots & & \ddots & \vdots \\ \mathbf{A}_{n1} & \cdots & \cdots & \mathbf{A}_{nn} \end{bmatrix} \in \mathbb{R}^{nd_x \times nd_x}, \quad (40)$$

$$\mathbf{A}_{ij} = \sum_{p=1}^n \sum_{q=1}^n \tilde{\mathbf{L}}(p, q) \mathbf{A}_E(p, i)^\top \mathbf{A}_E(q, j) \quad (41)$$

where  $\tilde{\mathbf{L}} := (\epsilon \mathbf{1}_n \mathbf{1}_n^\top + 2\gamma \mathbf{L})^{-1}$ . With the likelihood expressed as a quadratic function of  $\mathbf{x}$ , the log posterior over  $\mathbf{x}$  is given by

$$\log q(\mathbf{x}) = -\frac{1}{2} \mathbb{E}_{q(\mathbf{C})} [\mathbf{x}^\top \mathbf{A} \mathbf{x} - 2\mathbf{x}^\top \mathbf{b} + \mathbf{x}^\top \boldsymbol{\Pi}^{-1} \mathbf{x}] + \text{const}, \quad (42)$$

$$= -\frac{1}{2} [\mathbf{x}^\top (\langle \mathbf{A} \rangle_{q(\mathbf{C})} + \boldsymbol{\Pi}^{-1}) \mathbf{x} - 2\mathbf{x}^\top \langle \mathbf{b} \rangle_{q(\mathbf{C})}] + \text{const}, \quad (43)$$

The posterior over  $\mathbf{x}$  is given by

$$q(\mathbf{x}) = \mathcal{N}(\mathbf{x} | \boldsymbol{\mu}_{\mathbf{x}}, \boldsymbol{\Sigma}_{\mathbf{x}}), \quad (44)$$

where

$$\boldsymbol{\Sigma}_{\mathbf{x}}^{-1} = \langle \mathbf{A} \rangle_{q(\mathbf{C})} + \boldsymbol{\Pi}^{-1}, \quad (45)$$

$$\boldsymbol{\mu}_{\mathbf{x}} = \boldsymbol{\Sigma}_{\mathbf{x}} \langle \mathbf{b} \rangle_{q(\mathbf{C})}. \quad (46)$$

Notice that the parameters of  $q(\mathbf{x})$  depend on the sufficient statistics  $\langle \mathbf{A} \rangle_{q(\mathbf{C})}$  and  $\langle \mathbf{b} \rangle_{q(\mathbf{C})}$  whose explicit forms are given in section C.1.2.

### C.1.2 Sufficient statistics $\mathbf{A}$ and $\mathbf{b}$ for $q(\mathbf{x})$

Given the posterior over  $\mathbf{c}$ , the sufficient statistics  $\langle \mathbf{A} \rangle_{q(\mathbf{C})}$  and  $\langle \mathbf{b} \rangle_{q(\mathbf{C})}$  necessary to characterise  $q(\mathbf{x})$  are computed as following:

$$\begin{aligned}
\langle \mathbf{A}_{ij} \rangle_{q(\mathbf{c})} &= \sum_{p=1}^n \sum_{q=1}^n \tilde{\mathbf{L}}(p, q) \langle \mathbf{A}_E(p, i)^\top \mathbf{A}_E(q, j) \rangle_{q(\mathbf{c})}, \\
&= \gamma^2 \sum_{p=1}^n \sum_{q=1}^n \tilde{\mathbf{L}}(p, q) \langle (-\eta_{pi}(\mathbf{C}_p + \mathbf{C}_i) + \delta_{pi} \sum_k \eta_{pk}(\mathbf{C}_k + \mathbf{C}_p))^\top (-\eta_{qj}(\mathbf{C}_q + \mathbf{C}_j) + \delta_{qj} \sum_{k'} \eta_{qk'}(\mathbf{C}_{k'} + \mathbf{C}_q)) \rangle_{q(\mathbf{c})} \\
&= \gamma^2 \sum_{p=1}^n \sum_{q=1}^n \tilde{\mathbf{L}}(p, q) ( \eta_{pi} \eta_{qj} \langle \mathbf{C}_p^\top \mathbf{C}_q + \mathbf{C}_p^\top \mathbf{C}_j + \mathbf{C}_i^\top \mathbf{C}_q + \mathbf{C}_i^\top \mathbf{C}_j \rangle_{q(\mathbf{c})} \\
&\quad - \eta_{pi} \delta_{qj} \sum_{k'} \eta_{qk'} \langle \mathbf{C}_p^\top \mathbf{C}_{k'} + \mathbf{C}_p^\top \mathbf{C}_q + \mathbf{C}_i^\top \mathbf{C}_{k'} + \mathbf{C}_i^\top \mathbf{C}_q \rangle_{q(\mathbf{c})} \\
&\quad - \eta_{qj} \delta_{pi} \sum_k \eta_{pk} \langle \mathbf{C}_k^\top \mathbf{C}_q + \mathbf{C}_k^\top \mathbf{C}_j + \mathbf{C}_p^\top \mathbf{C}_q + \mathbf{C}_p^\top \mathbf{C}_j \rangle_{q(\mathbf{c})} \\
&\quad + \delta_{pi} \delta_{qj} \sum_k \sum_{k'} \eta_{pk} \eta_{qk'} \langle \mathbf{C}_k^\top \mathbf{C}_{k'} + \mathbf{C}_k^\top \mathbf{C}_q + \mathbf{C}_p^\top \mathbf{C}_{k'} + \mathbf{C}_p^\top \mathbf{C}_q \rangle_{q(\mathbf{c})} )
\end{aligned} \tag{47}$$

Thanks to the delta function, the last three terms above are non-zero only when  $p = i$  and  $q = j$ . Therefore, we can replace  $p$  with  $i$ , and  $q$  with  $j$ , which simplifies the above as

$$\begin{aligned}
&\gamma^2 \sum_{p=1}^n \sum_{q=1}^n \tilde{\mathbf{L}}(p, q) \eta_{pi} \eta_{qj} \langle \mathbf{C}_p^\top \mathbf{C}_q + \mathbf{C}_p^\top \mathbf{C}_j + \mathbf{C}_i^\top \mathbf{C}_q + \mathbf{C}_i^\top \mathbf{C}_j \rangle_{q(\mathbf{c})} \\
&- \gamma^2 \sum_{p=1}^n \sum_{k'}^n \tilde{\mathbf{L}}(p, j) \eta_{pi} \eta_{jk'} \langle \mathbf{C}_p^\top \mathbf{C}_{k'} + \mathbf{C}_p^\top \mathbf{C}_j + \mathbf{C}_i^\top \mathbf{C}_{k'} + \mathbf{C}_i^\top \mathbf{C}_j \rangle_{q(\mathbf{c})} \\
&- \gamma^2 \sum_{q=1}^n \sum_k^n \tilde{\mathbf{L}}(i, q) \eta_{qj} \eta_{ik} \langle \mathbf{C}_k^\top \mathbf{C}_q + \mathbf{C}_k^\top \mathbf{C}_j + \mathbf{C}_i^\top \mathbf{C}_q + \mathbf{C}_i^\top \mathbf{C}_j \rangle_{q(\mathbf{c})} \\
&+ \gamma^2 \tilde{\mathbf{L}}(i, j) \sum_k \sum_{k'} \eta_{ik} \eta_{jk'} \langle \mathbf{C}_k^\top \mathbf{C}_{k'} + \mathbf{C}_k^\top \mathbf{C}_j + \mathbf{C}_i^\top \mathbf{C}_{k'} + \mathbf{C}_i^\top \mathbf{C}_j \rangle_{q(\mathbf{c})}
\end{aligned}$$

We can make the equation above even simpler by replacing  $k'$  with  $q$  (second line),  $k$  with  $p$  (third line), and both  $k$  and  $k'$  with  $p$  and  $q$  (fourth line), which gives us

$$\langle \mathbf{A}_{ij} \rangle_{q(\mathbf{c})} = \gamma^2 \sum_{p=1}^n \sum_{q=1}^n [\tilde{\mathbf{L}}(p, q) - \tilde{\mathbf{L}}(p, j) - \tilde{\mathbf{L}}(i, q) + \tilde{\mathbf{L}}(i, j)] \eta_{pi} \eta_{qj} \langle \mathbf{C}_p^\top \mathbf{C}_q + \mathbf{C}_p^\top \mathbf{C}_j + \mathbf{C}_i^\top \mathbf{C}_q + \mathbf{C}_i^\top \mathbf{C}_j \rangle_{q(\mathbf{c})}. \tag{48}$$

For  $\mathbf{b}_i$ , we have

$$\langle \mathbf{b}_i \rangle_{q(\mathbf{c})} = \gamma \sum_{j=1}^n \eta_{ij} (\langle \mathbf{C}_j \rangle_{q(\mathbf{c})}^\top (\mathbf{y}_i - \mathbf{y}_j) - \langle \mathbf{C}_i \rangle_{q(\mathbf{c})}^\top (\mathbf{y}_j - \mathbf{y}_i)), \tag{49}$$

where  $\langle \mathbf{C}_i \rangle_{q(\mathbf{c})}$  is  $i$ -th chunk of  $\boldsymbol{\mu}_{\mathbf{C}}$ , where each chunk is  $(d_y \times d_x)$  (50)

$\langle \mathbf{C}_i \rangle_{q(\mathbf{c})}$  is  $i$ -th chunk of  $\boldsymbol{\mu}_{\mathbf{C}}$ , where each chunk is  $(d_y \times d_x)$  (51)

$\langle \mathbf{C}_i^\top \mathbf{C}_j \rangle_{q(\mathbf{c})}$  is  $(i, j)$ -th  $(d_x \times d_x)$  chunk of  $d_y \boldsymbol{\Sigma}_{\mathbf{C}} + \langle \mathbf{C}_i \rangle_{q(\mathbf{c})}^\top \langle \mathbf{C}_j \rangle_{q(\mathbf{c})}$ , (52)

### C.1.3 Computing $q(\mathbf{C})$

Next, we compute  $q(\mathbf{C})$  by integrating out  $\mathbf{x}$  from the total log joint distribution:

$$\log q(\mathbf{C}) = \mathbb{E}_{q(\mathbf{x})} [\log p(\mathbf{y}, \mathbf{C}, \mathbf{X} | \mathbf{G}, \boldsymbol{\theta})] + \text{const}, \tag{53}$$

$$= \mathbb{E}_{q(\mathbf{x})} [\log p(\mathbf{y} | \mathbf{C}, \mathbf{x}, \mathbf{G}, \boldsymbol{\theta}) + \log p(\mathbf{x} | \mathbf{G}, \boldsymbol{\theta})] + \log p(\mathbf{C} | \mathbf{G}, \boldsymbol{\theta}) + \text{const}. \tag{54}$$

We re-write  $p(\mathbf{y}|\mathbf{C}, \mathbf{x}, \mathbf{G}, \boldsymbol{\theta})$  as a quadratic function in  $\mathbf{C}$ :

$$\log p(\mathbf{y}|\mathbf{C}, \mathbf{x}, \mathbf{G}, \boldsymbol{\theta}) = -\frac{1}{2}\text{Tr}(\mathbf{Q}\tilde{\mathbf{L}}\mathbf{Q}^\top \mathbf{C}^\top \mathbf{C} - 2\mathbf{C}^\top \mathbf{V}^{-1}\mathbf{H}) + \text{const}, \quad (55)$$

where

$$\begin{aligned} \boldsymbol{\Gamma} &:= \mathbf{Q}\tilde{\mathbf{L}}\mathbf{Q}^\top, \\ \boldsymbol{\Gamma} &= \begin{bmatrix} \boldsymbol{\Gamma}_{11} & \boldsymbol{\Gamma}_{12} & \cdots & \boldsymbol{\Gamma}_{1n} \\ \vdots & & \ddots & \vdots \\ \boldsymbol{\Gamma}_{n1} & \cdots & \cdots & \boldsymbol{\Gamma}_{nn} \end{bmatrix} \\ \boldsymbol{\Gamma}_{ij} &= \sum_{k=1}^n \sum_{k'=1}^n \tilde{\mathbf{L}}(k, k') \mathbf{q}_k(i) \mathbf{q}_{k'}(j)^\top. \end{aligned} \quad (56)$$

The log posterior over  $\mathbf{C}$  is given by

$$\log q(\mathbf{C}) = -\frac{1}{2}\text{Tr} [\langle \boldsymbol{\Gamma} \rangle_{q(\mathbf{x})} \mathbf{C}^\top \mathbf{C} - 2\mathbf{C}^\top \mathbf{V}^{-1} \langle \mathbf{H} \rangle_{q(\mathbf{x})} + (\epsilon \mathbf{J} \mathbf{J}^\top + \boldsymbol{\Omega}^{-1}) \mathbf{C}^\top \mathbf{C}] + \text{const},$$

The posterior over  $\mathbf{C}$  is given by

$$\boldsymbol{\Sigma}_{\mathbf{C}}^{-1} = (\langle \boldsymbol{\Gamma} \rangle_{q(\mathbf{x})} + \epsilon \mathbf{J} \mathbf{J}^\top + \boldsymbol{\Omega}^{-1}) \otimes \mathbf{I}, \quad (57)$$

$$= \boldsymbol{\Sigma}_{\mathbf{C}}^{-1} \otimes \mathbf{I}, \quad \text{where } \boldsymbol{\Sigma}_{\mathbf{C}}^{-1} := \langle \boldsymbol{\Gamma} \rangle_{q(\mathbf{x})} + \epsilon \mathbf{J} \mathbf{J}^\top + \boldsymbol{\Omega}^{-1} \quad (58)$$

$$\boldsymbol{\mu}_{\mathbf{C}} = \mathbf{V}^{-1} \langle \mathbf{H} \rangle_{q(\mathbf{x})} \boldsymbol{\Sigma}_{\mathbf{C}}^\top. \quad (59)$$

Therefore, the approximate posterior over  $\mathbf{C}$  is given by

$$q(\mathbf{C}) = \mathcal{MN}(\boldsymbol{\mu}_{\mathbf{C}}, \mathbf{I}, \boldsymbol{\Sigma}_{\mathbf{C}}). \quad (60)$$

The parameters of  $q(\mathbf{C})$  depend on the sufficient statistics  $\langle \boldsymbol{\Gamma} \rangle_{q(\mathbf{x})}$  and  $\langle \mathbf{H} \rangle_{q(\mathbf{x})}$  which are given in section C.1.4.

#### C.1.4 Sufficient statistics $\boldsymbol{\Gamma}$ and $\mathbf{H}$

Given the posterior over  $\mathbf{x}$ , the sufficient statistics  $\langle \boldsymbol{\Gamma} \rangle_{q(\mathbf{x})}$  and  $\langle \mathbf{H} \rangle_{q(\mathbf{x})}$  necessary to characterise  $q(\mathbf{C})$  are computed as follows. Similar to  $\langle \mathbf{A} \rangle$ , we can simplify  $\langle \boldsymbol{\Gamma}_{ij} \rangle_{q(\mathbf{x})}$  as

$$\langle \boldsymbol{\Gamma}_{ij} \rangle_{q(\mathbf{x})} = \gamma^2 \sum_{k=1}^n \sum_{k'=1}^n [\tilde{\mathbf{L}}(k, k') - \tilde{\mathbf{L}}(k, j) - \tilde{\mathbf{L}}(i, k') + \tilde{\mathbf{L}}(i, j)] \eta_{ki} \eta_{k'j} \langle \mathbf{x}_k \mathbf{x}_{k'}^\top - \mathbf{x}_k \mathbf{x}_j^\top - \mathbf{x}_i \mathbf{x}_{k'}^\top + \mathbf{x}_i \mathbf{x}_j^\top \rangle_{q(\mathbf{x})}. \quad (61)$$

For  $\langle \mathbf{H}_i \rangle_{q(\mathbf{x})}$ , we have

$$\langle \mathbf{H}_i \rangle_{q(\mathbf{x})} = \sum_{j=1}^n \eta_{ij} \langle (\mathbf{y}_j - \mathbf{y}_i)(\mathbf{x}_j - \mathbf{x}_i)^\top \rangle_{q(\mathbf{x})}, \quad (62)$$

$$= \sum_{j=1}^n \eta_{ij} (\mathbf{y}_j \langle \mathbf{x}_j \rangle_{q(\mathbf{x})}^\top - \mathbf{y}_j \langle \mathbf{x}_i \rangle_{q(\mathbf{x})}^\top - \mathbf{y}_i \langle \mathbf{x}_j \rangle_{q(\mathbf{x})}^\top + \mathbf{y}_i \langle \mathbf{x}_i \rangle_{q(\mathbf{x})}^\top), \quad (63)$$

where  $\langle \mathbf{x}_i \mathbf{x}_j^\top \rangle_{q(\mathbf{x})} = \boldsymbol{\Sigma}_{\mathbf{x}}^{(ij)} + \langle \mathbf{x}_i \rangle_{q(\mathbf{x})} \langle \mathbf{x}_j \rangle_{q(\mathbf{x})}^\top$  and  $\boldsymbol{\Sigma}_{\mathbf{x}}^{(ij)} = \text{cov}(\mathbf{x}_i, \mathbf{x}_j)$ .

## C.2 VM step

We set the parameters  $\boldsymbol{\theta} = (\alpha, \gamma)$  by maximising the free energy w.r.t.  $\boldsymbol{\theta}$ :

$$\begin{aligned} \hat{\boldsymbol{\theta}} &= \arg \max_{\boldsymbol{\theta}} \mathbb{E}_{q(\mathbf{x})q(\mathbf{C})} [\log p(\mathbf{y}, \mathbf{C}, \mathbf{x} | \mathbf{G}, \boldsymbol{\theta}) - \log q(\mathbf{x}, \mathbf{C})], \\ &= \arg \max_{\boldsymbol{\theta}} \mathbb{E}_{q(\mathbf{x})q(\mathbf{C})} [\log p(\mathbf{y} | \mathbf{C}, \mathbf{x}, \mathbf{G}, \boldsymbol{\theta}) + \log p(\mathbf{C} | \mathbf{G}, \boldsymbol{\theta}) + \log p(\mathbf{x} | \mathbf{G}, \boldsymbol{\theta}) - \log q(\mathbf{x}) - \log q(\mathbf{C})]. \end{aligned} \quad (64)$$

Once we update all the parameters, we achieve the following lower bound:

$$\mathcal{L}(q(\mathbf{x}, \mathbf{C}), \hat{\boldsymbol{\theta}}) = \mathbb{E}_{q(\mathbf{x})q(\mathbf{C})} [\log p(\mathbf{y} | \mathbf{C}, \mathbf{x}, \mathbf{G}, \hat{\boldsymbol{\theta}})] - D_{KL}(q(\mathbf{C}) || p(\mathbf{C} | \mathbf{G})) - D_{KL}(q(\mathbf{x}) || p(\mathbf{x} | \mathbf{G}, \hat{\boldsymbol{\theta}})). \quad (65)$$

### Update for $\gamma$

Recall that the precision matrix in the likelihood term is  $\mathbf{V}^{-1} = \gamma \mathbf{I}_{d_y}$ . For updating  $\gamma$ , it is sufficient to consider the log conditional likelihood integrating out  $\mathbf{x}, \mathbf{C}$ :

$$\mathbb{E}_{q(\mathbf{x})q(\mathbf{C})}[\log p(\mathbf{y}|\mathbf{C}, \mathbf{x}, \mathbf{G}, \boldsymbol{\theta})] = \mathbb{E}_{q(\mathbf{x})q(\mathbf{C})} \left[ -\frac{1}{2} \text{Tr}(\mathbf{\Gamma} \mathbf{C}^\top \mathbf{C} - 2\mathbf{C}^\top \mathbf{V}^{-1} \mathbf{H}) - \frac{1}{2} \mathbf{y}^\top \Sigma_{\mathbf{y}}^{-1} \mathbf{y} - \frac{1}{2} \log |2\pi \Sigma_{\mathbf{y}}| \right], \quad (66)$$

which is

$$\begin{aligned} & -\frac{1}{2} \mathbb{E}_{q(\mathbf{C})} \text{Tr}(\langle \mathbf{\Gamma} \rangle_{q(\mathbf{x})} \mathbf{C}^\top \mathbf{C} - 2\mathbf{C}^\top \mathbf{V}^{-1} \langle \mathbf{H} \rangle_{q(\mathbf{x})}) - \frac{1}{2} \mathbf{y}^\top \Sigma_{\mathbf{y}}^{-1} \mathbf{y} - \frac{1}{2} \log |2\pi \Sigma_{\mathbf{y}}|, \\ & = -\frac{1}{2} \mathbb{E}_{q(\mathbf{C})} [\mathbf{c}^\top (\langle \mathbf{\Gamma} \rangle_{q(\mathbf{x})} \otimes \mathbf{I}_{d_y}) \mathbf{c} - 2\mathbf{c}^\top \text{vec}(\mathbf{V}^{-1} \langle \mathbf{H} \rangle_{q(\mathbf{x})})] - \frac{1}{2} \mathbf{y}^\top \Sigma_{\mathbf{y}}^{-1} \mathbf{y} - \frac{1}{2} \log |2\pi \Sigma_{\mathbf{y}}|, \\ & = -\frac{d_y}{2} \text{Tr}(\langle \mathbf{\Gamma} \rangle_{q(\mathbf{x})} \Sigma_{\mathbf{C}}) - \frac{1}{2} \text{Tr}(\langle \mathbf{\Gamma} \rangle_{q(\mathbf{x})} \boldsymbol{\mu}_{\mathbf{C}} \boldsymbol{\mu}_{\mathbf{C}}^\top) + \gamma \text{Tr}(\boldsymbol{\mu}_{\mathbf{C}}^\top \langle \mathbf{H} \rangle_{q(\mathbf{x})}) - \frac{1}{2} \mathbf{y}^\top \Sigma_{\mathbf{y}}^{-1} \mathbf{y} - \frac{1}{2} \log |2\pi \Sigma_{\mathbf{y}}|. \end{aligned}$$

The log determinant term is further simplified as

$$-\frac{1}{2} \log |2\pi \Sigma_{\mathbf{y}}| = -\frac{nd_y}{2} \log(2\pi) + \frac{d_y}{2} \log |\epsilon \mathbf{1}_n \mathbf{1}_n^\top + 2\gamma \mathbf{L}|. \quad (67)$$

We denote the objective function for updating  $\gamma$  by  $l(\gamma)$ , which consists of all the terms that depend on  $\gamma$  above

$$\begin{aligned} l(\gamma) &= -\frac{1}{2} \text{Tr}(\langle \mathbf{\Gamma} \rangle_{q(\mathbf{x})} (d_y \Sigma_{\mathbf{C}} + \boldsymbol{\mu}_{\mathbf{C}} \boldsymbol{\mu}_{\mathbf{C}}^\top)) + \gamma \text{Tr}(\boldsymbol{\mu}_{\mathbf{C}}^\top \langle \mathbf{H} \rangle_{q(\mathbf{x})}) - \frac{1}{2} \mathbf{y}^\top ((\epsilon \mathbf{1}_n \mathbf{1}_n^\top + 2\gamma \mathbf{L}) \otimes \mathbf{I}_{d_y}) \mathbf{y} + \frac{d_y}{2} \log |\epsilon \mathbf{1}_n \mathbf{1}_n^\top + 2\gamma \mathbf{L}|, \\ &= l_1(\gamma) + l_2(\gamma) + l_3(\gamma) + l_4(\gamma), \end{aligned}$$

where each term is given below. From the definition of  $\mathbf{\Gamma} = \mathbf{Q} \tilde{\mathbf{L}} \mathbf{Q}^\top$ , we rewrite the first term above as

$$l_1(\gamma) = -\frac{1}{2} \text{Tr}(\langle \mathbf{Q} \tilde{\mathbf{L}} \mathbf{Q}^\top \rangle_{q(\mathbf{x})} (d_y \Sigma_{\mathbf{C}} + \boldsymbol{\mu}_{\mathbf{C}} \boldsymbol{\mu}_{\mathbf{C}}^\top)).$$

We separate  $\gamma$  from  $\mathbf{Q}$  and plug in the definition of  $\tilde{\mathbf{L}}$ , which gives us

$$l_1(\gamma) = -\frac{1}{2} \gamma^2 \text{Tr}(\langle \hat{\mathbf{Q}} \tilde{\mathbf{L}} \hat{\mathbf{Q}}^\top \rangle_{q(\mathbf{x})} (d_y \Sigma_{\mathbf{C}} + \boldsymbol{\mu}_{\mathbf{C}} \boldsymbol{\mu}_{\mathbf{C}}^\top)),$$

where the  $j$ th chunk (of length  $d_x$ ) of  $i$ th column of  $\hat{\mathbf{Q}} \in \mathbb{R}^{nd_x \times n}$  is given by  $\hat{\mathbf{q}}_i(j) = \eta_{ij}(\mathbf{x}_i - \mathbf{x}_j) + \delta_{ij}[\sum_k \eta_{ik}(\mathbf{x}_i - \mathbf{x}_k)]$ . We can explicitly write down  $\tilde{\mathbf{L}}$  in terms of  $\gamma$  using orthogonality of singular vectors between  $\epsilon \mathbf{1}_n \mathbf{1}_n^\top$  and  $2\gamma \mathbf{L}$ , where we denote the singular decomposition of  $\mathbf{L} = \mathbf{U}_L \mathbf{D}_L \mathbf{V}_L^\top$

$$\begin{aligned} \tilde{\mathbf{L}} &= (\epsilon \mathbf{1}_n \mathbf{1}_n^\top + 2\gamma \mathbf{L})^{-1}, \\ &:= \mathbf{V}_L \begin{bmatrix} 0 & 0 & \cdots & 0 \\ 0 & & \ddots & \vdots \\ 0 & \cdots & \cdots & \frac{1}{\epsilon n} \end{bmatrix} \mathbf{U}_L^\top + \frac{1}{2\gamma} \mathbf{V}_L \begin{bmatrix} \frac{1}{\mathbf{D}_L(1,1)} & 0 & \cdots & 0 \\ 0 & \frac{1}{\mathbf{D}_L(2,2)} & \ddots & \vdots \\ 0 & \cdots & \cdots & 0 \end{bmatrix} \mathbf{U}_L^\top, \\ &= \tilde{\mathbf{L}}_\epsilon + \frac{1}{2\gamma} \tilde{\mathbf{L}}_L \end{aligned}$$

Hence,  $l_1(\gamma)$  is given by

$$l_1(\gamma) = -\frac{1}{2} \gamma^2 \text{Tr}(\langle \hat{\mathbf{Q}} \tilde{\mathbf{L}}_\epsilon \hat{\mathbf{Q}}^\top \rangle_{q(\mathbf{x})} (d_y \Sigma_{\mathbf{C}} + \boldsymbol{\mu}_{\mathbf{C}} \boldsymbol{\mu}_{\mathbf{C}}^\top)) - \frac{\gamma}{4} \text{Tr}(\langle \hat{\mathbf{Q}} \tilde{\mathbf{L}}_L \hat{\mathbf{Q}}^\top \rangle_{q(\mathbf{x})} (d_y \Sigma_{\mathbf{C}} + \boldsymbol{\mu}_{\mathbf{C}} \boldsymbol{\mu}_{\mathbf{C}}^\top)).$$

Let  $\langle \mathbf{\Gamma}_\epsilon \rangle := \langle \hat{\mathbf{Q}} \tilde{\mathbf{L}}_\epsilon \hat{\mathbf{Q}}^\top \rangle_{q(\mathbf{x})}$ . Similar to Eq. 61, we have

$$\langle \mathbf{\Gamma}_{\epsilon, ij} \rangle = \gamma^2 \sum_{k=1}^n \sum_{k'=1}^n [\tilde{\mathbf{L}}_\epsilon(k, k') - \tilde{\mathbf{L}}_\epsilon(k, j) - \tilde{\mathbf{L}}_\epsilon(i, k') + \tilde{\mathbf{L}}_\epsilon(i, j)] \eta_{ki} \eta_{k'j} \langle \mathbf{x}_k \mathbf{x}_{k'}^\top - \mathbf{x}_k \mathbf{x}_j^\top - \mathbf{x}_i \mathbf{x}_{k'}^\top + \mathbf{x}_i \mathbf{x}_j^\top \rangle_{q(\mathbf{x})}.$$

Because  $\mathbf{L}$  is symmetric,  $\mathbf{U}_L = \mathbf{V}_L$  in the SVD and  $\mathbf{U}_L$  contains the eigenvectors of  $\mathbf{L}$ . So  $\tilde{\mathbf{L}}_\epsilon(p, q) = \mathbf{U}_L(p, n) \mathbf{U}_L(n, q) \frac{1}{\epsilon n}$  where we refer to the  $n^{\text{th}}$  (last) eigenvector of  $\mathbf{L}$ . However, the last eigenvector of  $\mathbf{L}$  corresponding to the eigenvalue 0 has the same element in each coordinate i.e.,  $\mathbf{U}_L(:, n) = a \mathbf{1}_n$  for some constant  $a \in \mathbb{R}$ . This implies that

$\tilde{\mathbf{L}}_\epsilon(p, q) = aa \frac{1}{\epsilon n}$ . The elements of  $\tilde{\mathbf{L}}_\epsilon$  have the same value, implying  $[\tilde{\mathbf{L}}_\epsilon(k, k') - \tilde{\mathbf{L}}_\epsilon(k, j) - \tilde{\mathbf{L}}_\epsilon(i, k') + \tilde{\mathbf{L}}_\epsilon(i, j)] = \frac{1}{\epsilon n}[aa - aa - aa + aa] = 0$  and  $\langle \mathbf{T}_{\epsilon, ij} \rangle = 0$  for all  $i, j$  blocks. We have

$$l_1(\gamma) = -\frac{\gamma}{4} \text{Tr}(\langle \hat{\mathbf{Q}} \tilde{\mathbf{L}}_L \hat{\mathbf{Q}}^\top \rangle_{q(\mathbf{x})} (d_y \mathbf{\Sigma}_C + \boldsymbol{\mu}_C^\top \boldsymbol{\mu}_C)).$$

The second term  $l_2(\gamma)$  is given by

$$l_2(\gamma) = \gamma \text{Tr}(\boldsymbol{\mu}_C^\top \langle \mathbf{H} \rangle_{q(\mathbf{x})}),$$

and the third term  $l_3(\gamma)$  is rewritten as

$$l_3(\gamma) = -\gamma \text{Tr}(\mathbf{L} \mathbf{Y}^\top \mathbf{Y}).$$

Finally, the last term is simplified as

$$\frac{d_y}{2} \log |\epsilon \mathbf{1}_n \mathbf{1}_n^\top + 2\gamma \mathbf{L}| = \frac{d_y}{2} \left( \sum_{i=1}^{n-1} \log \mathbf{D}_L(i, i) + \log(n\epsilon) + (n-1) \log(2\gamma) \right).$$

Hence,

$$l_4(\gamma) = \frac{d_y}{2} (n-1) \log(2\gamma).$$

The update for  $\gamma$  is thus given by

$$\begin{aligned} \gamma &= \arg \max_{\gamma} l(\gamma) = \arg \max_{\gamma} l_1(\gamma) + l_2(\gamma) + l_3(\gamma) + l_4(\gamma) \\ &= -\frac{d_y(n-1)/2}{-\frac{1}{4} \text{Tr}(\langle \hat{\mathbf{Q}} \tilde{\mathbf{L}}_L \hat{\mathbf{Q}}^\top \rangle_{q(\mathbf{x})} (d_y \mathbf{\Sigma}_C + \boldsymbol{\mu}_C^\top \boldsymbol{\mu}_C)) + \text{Tr}(\boldsymbol{\mu}_C^\top \langle \mathbf{H} \rangle_{q(\mathbf{x})}) - \text{Tr}(\mathbf{L} \mathbf{Y}^\top \mathbf{Y})}. \end{aligned}$$

### Update for $\alpha$

We update  $\alpha$  by maximizing Eq. (64) which is equivalent to maximizing the following expression.

$$-D_{KL}(q(\mathbf{x}) || p(\mathbf{x} | \mathbf{G}, \hat{\boldsymbol{\theta}})) = \mathbb{E}_{q(\mathbf{x})q(\mathbf{C})} [\log p(\mathbf{x} | \mathbf{G}, \boldsymbol{\theta}) - \log q(\mathbf{x})] \quad (68)$$

$$\begin{aligned} &= - \int d\mathbf{x} \mathcal{N}(\mathbf{x} | \boldsymbol{\mu}_\mathbf{x}, \mathbf{\Sigma}_\mathbf{x}) \log \frac{\mathcal{N}(\mathbf{x} | \boldsymbol{\mu}_\mathbf{x}, \mathbf{\Sigma}_\mathbf{x})}{\mathcal{N}(\mathbf{x} | \mathbf{0}, \mathbf{\Pi})}, \\ &= \frac{1}{2} \log |\mathbf{\Sigma}_\mathbf{x} \mathbf{\Pi}^{-1}| - \frac{1}{2} \text{Tr} [\mathbf{\Pi}^{-1} \mathbf{\Sigma}_\mathbf{x} - \mathbf{I}_{nd_x}] - \frac{1}{2} \boldsymbol{\mu}_\mathbf{x}^\top \mathbf{\Pi}^{-1} \boldsymbol{\mu}_\mathbf{x}, \end{aligned} \quad (69)$$

$$\begin{aligned} &= \frac{1}{2} \log |\mathbf{\Sigma}_\mathbf{x}| + \frac{1}{2} \log |\alpha \mathbf{I} + \mathbf{\Omega}^{-1}| - \frac{\alpha}{2} \text{Tr} [\mathbf{\Sigma}_\mathbf{x}] - \frac{1}{2} \text{Tr} [\mathbf{\Omega}^{-1} \mathbf{\Sigma}_\mathbf{x}] + \frac{nd_x}{2} - \frac{\alpha}{2} \boldsymbol{\mu}_\mathbf{x}^\top \boldsymbol{\mu}_\mathbf{x} - \frac{1}{2} \boldsymbol{\mu}_\mathbf{x}^\top \mathbf{\Omega}^{-1} \boldsymbol{\mu}_\mathbf{x} \end{aligned} \quad (70)$$

$$:= f_\alpha(\alpha) \quad (71)$$

The stationarity condition of  $\alpha$  is given by

$$\frac{\partial}{\partial \alpha} \mathbb{E}_{q(\mathbf{x})q(\mathbf{C})} [\log p(\mathbf{x} | \mathbf{G}, \boldsymbol{\theta}) - \log q(\mathbf{x})] = \frac{1}{2} \text{Tr}((\alpha \mathbf{I} + \mathbf{\Omega}^{-1})^{-1}) - \frac{1}{2} \text{Tr} [\mathbf{\Sigma}_\mathbf{x}] - \frac{1}{2} \boldsymbol{\mu}_\mathbf{x}^\top \boldsymbol{\mu}_\mathbf{x} = 0, \quad (72)$$

which is not closed-form and requires finding the root of the equation.

For updating  $\alpha$ , we will find  $\alpha = \arg \max_{\alpha} f_\alpha(\alpha)$ :

$$\alpha = \arg \max_{\alpha} \log |\alpha \mathbf{I} + \mathbf{\Omega}^{-1}| - \alpha \text{Tr} [\mathbf{\Sigma}_\mathbf{x}] - \alpha \boldsymbol{\mu}_\mathbf{x}^\top \boldsymbol{\mu}_\mathbf{x}. \quad (73)$$

Assume  $\mathbf{\Omega}^{-1} = E_\Omega V_\Omega E_\Omega^\top$  by eigen-decomposition and  $V_\Omega = \text{diag}(v_{11}, \dots, v_{nd_x, nd_x})$ . The main difficult in optimizing  $\alpha$  comes from the first term.

$$\log |\alpha \mathbf{I} + \mathbf{\Omega}^{-1}| \stackrel{(a)}{=} \log |\alpha E_\Omega E_\Omega^\top + E_\Omega V_\Omega E_\Omega^\top| \quad (74)$$

$$= \log |E_\Omega (\alpha \mathbf{I} + V_\Omega) E_\Omega^\top| \quad (75)$$

$$\stackrel{(b)}{=} \log |\alpha \mathbf{I} + V_\Omega| = \sum_{i=1}^{nd_x} \log(\alpha + v_{ii}) \quad (76)$$

$$\stackrel{(c)}{=} d_x \sum_{j=1}^n \log(\alpha + 2\omega_j) \quad (77)$$



where at (a) we use the fact that  $E_\Omega$  is orthogonal. At (b), the determinant of a product is the product of the determinants, and that the determinant of an orthogonal matrix is 1. Assume that  $L = E_L V_L E_L^\top$  by eigen-decomposition and  $V_L = \text{diag}(\{\omega_i\}_{i=1}^n)$ . Recall that  $\Omega^{-1} = 2\mathbf{L} \otimes \mathbf{I}_{d_x}$ . By Theorem 1,  $v_{ii} = 2\omega_i$  and  $2\omega_i$  appears  $d_x$  times for each  $i = 1, \dots, n$ . This explains the  $d_x$  factor in (c).

In the implementation, we use `fminbnd` in Matlab to optimize the negative of Eq. (73) to get an update for  $\alpha$ . The eigen-decomposition of  $L$  (not  $\Omega^{-1}$  which is bigger) is needed only once in the beginning. We only need the eigenvalues of  $L$ , not the eigenvectors.

## KL divergence of $\mathbf{C}$

$$\begin{aligned}
& -D_{KL}(q(\mathbf{C})||p(\mathbf{C}|\mathbf{G})) \\
& = \mathbb{E}_{q(\mathbf{x})q(\mathbf{C})}[\log p(\mathbf{C}|\mathbf{G}, \boldsymbol{\theta}) - \log q(\mathbf{c})] \\
& = - \int d\mathbf{c} \mathcal{N}(\mathbf{c}|\boldsymbol{\mu}_\mathbf{c}, \boldsymbol{\Sigma}_\mathbf{c}) \log \frac{\mathcal{N}(\mathbf{c}|\boldsymbol{\mu}_\mathbf{c}, \boldsymbol{\Sigma}_\mathbf{c})}{\mathcal{N}(0, ((\epsilon\mathbf{J}\mathbf{J}^\top + \Omega^{-1}) \otimes \mathbf{I})^{-1})}, \\
& = \frac{1}{2} \log |\boldsymbol{\Sigma}_\mathbf{c}((\epsilon\mathbf{J}\mathbf{J}^\top + \Omega^{-1}) \otimes \mathbf{I})| - \frac{1}{2} \text{Tr} [\boldsymbol{\Sigma}_\mathbf{c}((\epsilon\mathbf{J}\mathbf{J}^\top + \Omega^{-1}) \otimes \mathbf{I}) - \mathbf{I}] - \frac{1}{2} \boldsymbol{\mu}_\mathbf{c}^\top ((\epsilon\mathbf{J}\mathbf{J}^\top + \Omega^{-1}) \otimes \mathbf{I}) \boldsymbol{\mu}_\mathbf{c}, \\
& = \frac{1}{2} \log |(\boldsymbol{\Sigma}_\mathbf{C}(\epsilon\mathbf{J}\mathbf{J}^\top + \Omega^{-1})) \otimes \mathbf{I}| - \frac{1}{2} \text{Tr} [(\boldsymbol{\Sigma}_\mathbf{C}(\epsilon\mathbf{J}\mathbf{J}^\top + \Omega^{-1})) \otimes \mathbf{I} - \mathbf{I}] - \frac{1}{2} \text{Tr}((\epsilon\mathbf{J}\mathbf{J}^\top + \Omega^{-1}) \boldsymbol{\mu}_\mathbf{C}^\top \boldsymbol{\mu}_\mathbf{C}), \\
& = \frac{d_y}{2} \log |\boldsymbol{\Sigma}_\mathbf{C}(\epsilon\mathbf{J}\mathbf{J}^\top + \Omega^{-1})| - \frac{d_y}{2} \text{Tr}[\boldsymbol{\Sigma}_\mathbf{C}(\epsilon\mathbf{J}\mathbf{J}^\top + \Omega^{-1})] + \frac{1}{2} n d_x d_y - \frac{1}{2} \text{Tr}((\epsilon\mathbf{J}\mathbf{J}^\top + \Omega^{-1}) \boldsymbol{\mu}_\mathbf{C}^\top \boldsymbol{\mu}_\mathbf{C}).
\end{aligned}$$

## D Connection to GP-LVM

To see how our model is related to GP-LVM, we integrate out  $\mathbf{C}$  from the likelihood:

$$\begin{aligned}
p(\mathbf{y}|\mathbf{x}, \mathbf{G}, \boldsymbol{\theta}) &= \int p(\mathbf{y}|\mathbf{c}, \mathbf{x}, \boldsymbol{\theta}) p(\mathbf{c}|\mathbf{G}) d\mathbf{c}, \\
&\propto \int \exp \left[ -\frac{1}{2} (\mathbf{c}^\top (\boldsymbol{\Gamma} \otimes \mathbf{I}) \mathbf{c} - 2\mathbf{c}^\top \text{vec}(\mathbf{V}^{-1}\mathbf{H})) - \frac{1}{2} \mathbf{y}^\top \boldsymbol{\Sigma}_\mathbf{y}^{-1} \mathbf{y} - \frac{1}{2} \mathbf{c}^\top ((\epsilon\mathbf{J}\mathbf{J}^\top + \Omega^{-1}) \otimes \mathbf{I}) \mathbf{c} \right] d\mathbf{c}, \\
&\propto \int \exp \left[ -\frac{1}{2} (\mathbf{c}^\top ((\boldsymbol{\Gamma} + \epsilon\mathbf{J}\mathbf{J}^\top + \Omega^{-1}) \otimes \mathbf{I}) \mathbf{c} - 2\mathbf{c}^\top \text{vec}(\mathbf{V}^{-1}\mathbf{H})) \right] d\mathbf{c} - \frac{1}{2} \mathbf{y}^\top \boldsymbol{\Sigma}_\mathbf{y}^{-1} \mathbf{y}, \\
&\propto \exp \left[ \frac{1}{2} \text{vec}(\mathbf{V}^{-1}\mathbf{H})^\top ((\boldsymbol{\Gamma} + \epsilon\mathbf{J}\mathbf{J}^\top + \Omega^{-1}) \otimes \mathbf{I})^{-T} \text{vec}(\mathbf{V}^{-1}\mathbf{H}) - \frac{1}{2} \mathbf{y}^\top \boldsymbol{\Sigma}_\mathbf{y}^{-1} \mathbf{y} \right],
\end{aligned}$$

where the last line comes from the fact :  $\int \exp [-\frac{1}{2} \mathbf{c}^\top \mathbf{M} \mathbf{c} + \mathbf{c}^\top \mathbf{m}] d\mathbf{c} \propto \exp [\frac{1}{2} \mathbf{m}^\top \mathbf{M}^{-T} \mathbf{m}]$ .

The term  $\text{vec}(\mathbf{V}^{-1}\mathbf{H})$  is linear in  $\mathbf{y}$  where

$$\begin{aligned}
\mathbf{H}_i &= \sum_{j=1}^n \eta_{ij} (\mathbf{y}_j - \mathbf{y}_i) (\mathbf{x}_j - \mathbf{x}_i)^\top, \\
&= \sum_{j=1}^n \mathbf{y}_j \eta_{ij} (\mathbf{x}_j - \mathbf{x}_i)^\top - \mathbf{y}_i \sum_{j=1}^n \eta_{ij} (\mathbf{x}_j - \mathbf{x}_i)^\top, \\
&= \tilde{\mathbf{Y}} \mathbf{u}_i + \mathbf{y}_i \mathbf{v}_i,
\end{aligned}$$

where the vectors  $\mathbf{u}_i$  and  $\mathbf{v}_i$  are defined by

$$\begin{aligned}
\tilde{\mathbf{Y}} &= [\mathbf{y}_1 \cdots \mathbf{y}_n], \\
\mathbf{u}_i &= \begin{bmatrix} \eta_{i1} (\mathbf{x}_1 - \mathbf{x}_i)^\top \\ \vdots \\ \eta_{in} (\mathbf{x}_n - \mathbf{x}_i)^\top \end{bmatrix}, \quad \mathbf{v}_i = - \sum_{j=1}^n \eta_{ij} (\mathbf{x}_j - \mathbf{x}_i)^\top.
\end{aligned}$$

Using these notations, we can write  $H$  as

$$\begin{aligned}
\mathbf{H} &= [\mathbf{H}_1, \dots, \mathbf{H}_n], \\
&= \tilde{\mathbf{Y}} \mathbf{W},
\end{aligned}$$

where

$$\begin{aligned}\mathbf{W} &= \mathbf{U}_u + \mathbf{V}_v, \\ \mathbf{U}_u &= [\mathbf{u}_1, \dots, \mathbf{u}_n], \\ \mathbf{V}_v &= \begin{bmatrix} \mathbf{v}_1 & 0 & \dots & 0 \\ 0 & \mathbf{v}_2 & \dots & 0 \\ \vdots & 0 & \ddots & 0 \\ 0 & \dots & 0 & \mathbf{v}_n \end{bmatrix}.\end{aligned}$$

So, we can explicitly write down  $\text{vec}(\mathbf{V}^{-1}\mathbf{H})$  as

$$\begin{aligned}\text{vec}(\mathbf{V}^{-1}\mathbf{H}) &= \text{vec}(\mathbf{V}^{-1}\tilde{\mathbf{Y}}\mathbf{W}), \\ &= (\mathbf{W}^\top \otimes \mathbf{V}^{-1})\text{vec}(\tilde{\mathbf{Y}}), \\ &= (\mathbf{W}^\top \otimes \mathbf{V}^{-1})\mathbf{y}.\end{aligned}$$

Using all these, we can rewrite the likelihood as

$$p(\mathbf{y}|\mathbf{x}, \mathbf{G}, \boldsymbol{\theta}) \propto \exp \left[ -\frac{1}{2} \mathbf{y}^\top \mathbf{K}_{LL}^{-1} \mathbf{y} \right],$$

where the precision matrix is given by

$$\begin{aligned}\mathbf{K}_{LL}^{-1} &= \boldsymbol{\Sigma}_y^{-1} - (\mathbf{W}^\top \otimes \mathbf{V}^{-1})^\top \boldsymbol{\Lambda} (\mathbf{W}^\top \otimes \mathbf{V}^{-1}), \\ \boldsymbol{\Lambda} &= ((\boldsymbol{\Gamma} + \epsilon \mathbf{J} \mathbf{J}^\top + \boldsymbol{\Omega}^{-1}) \otimes \mathbf{I})^{-T}.\end{aligned}$$

## E Useful results

In this section, we summarize theorems and matrix identities useful for deriving update equations of LL-LVM. The notation in this section is independent of the rest.

**Theorem 1.** *Let  $A \in \mathbb{R}^{n \times n}$  have eigenvalues  $\lambda_i$ , and let  $B \in \mathbb{R}^{m \times m}$  have eigenvalues  $\mu_j$ . Then the  $mn$  eigenvalues of  $A \otimes B$  are*

$$\lambda_1 \mu_1, \dots, \lambda_1 \mu_m, \lambda_2 \mu_1, \dots, \lambda_2 \mu_m, \dots, \lambda_n \mu_m.$$

**Theorem 2.** *A graph Laplacian  $L \in \mathbb{R}^{n \times n}$  is positive semi-definite. That is, its eigenvalues are non-negative.*

### E.1 Matrix identities

$$x^\top (A \circ B) y = \text{tr}(\text{diag}(x) A \text{diag}(y) B^\top) \quad (78)$$

From section 8.1.1 of the matrix cookbook [1],

$$\int \exp \left[ -\frac{1}{2} x^\top A x + c^\top x \right] dx = \sqrt{\det(2\pi A^{-1})} \exp \left[ \frac{1}{2} c^\top A^{-1} c \right]. \quad (79)$$

**Lemma 1.** *If  $X = (x_1 | \dots | x_n)$  and  $C = (c_1 | \dots | c_n)$ , then*

$$\int \exp \left[ -\frac{1}{2} \text{tr}(X^\top A X) + \text{tr}(C^\top X) \right] dX = \det(2\pi A^{-1})^{n/2} \exp \left[ \frac{1}{2} \text{tr}(C^\top A^{-1} C) \right].$$

Woodbury matrix identity

$$(A + UCV)^{-1} = A^{-1} - A^{-1}U(C^{-1} + VA^{-1}U)^{-1}VA^{-1}. \quad (80)$$

## References

- [1] K. B. Petersen and M. S. Pedersen. The matrix cookbook, nov 2012. Version 20121115.
